# Supplementary material for: Comparison between single anastomosis duodeno-ileal bypass with sleeve gastrectomy (SADI-S) and roux-en-y gastric bypass (RYGB) in terms of weight loss, comorbidities remission and complications. A Systematic Review with Meta-analysis.
Source: Research Square preprint supplement (doi:10.21203/rs.3.rs-5765250/v1), 2025-01-10
Supplement: Supplementary file 1 [file 2e4cb308541e98983c9da47e.pdf]

## TABLE OF CONTENTS

|                                                                |           |
|----------------------------------------------------------------|-----------|
| <b>S.1 Pre-BMI .....</b>                                       | <b>2</b>  |
| <b>S.2 Post-BMI .....</b>                                      | <b>4</b>  |
| <b>S.3 Total weight loss (TWL) .....</b>                       | <b>7</b>  |
| <b>S.4 Excess weight loss .....</b>                            | <b>9</b>  |
| <b>S.5 Diabetes Mellitus remission .....</b>                   | <b>12</b> |
| <b>S.6 Hypertension remission .....</b>                        | <b>15</b> |
| <b>S.7 Short-term postoperative complications .....</b>        | <b>17</b> |
| <b>S.8 Long-term postoperative complications .....</b>         | <b>19</b> |
| <b>S.9 Severe complications (Clavien-Dindo &gt;3) .....</b>    | <b>21</b> |
| <b>S.10 Operative duration .....</b>                           | <b>24</b> |
| <b>S.11 Hospital stay .....</b>                                | <b>26</b> |
| <b>S.12. Assessment of methodological quality .....</b>        | <b>29</b> |
| <b>S.13. Studies excluded from the systematic review .....</b> | <b>30</b> |

## S.1 Pre-BMI

### 1.1 Meta-analysis summary

Meta-analysis summary  
Random-effects model  
Method: DerSimonian-Laird

Number of studies = 9

Heterogeneity:

tau2 = 9.7052

I2 (%) = 95.55

H2 = 22.48

| Study               | Mean Diff. | [95% Conf. Interval] |        | % Weight |
|---------------------|------------|----------------------|--------|----------|
| Torres et al        | 3.800      | 2.249                | 5.351  | 11.71    |
| Cottam et al        | 1.300      | 0.022                | 2.578  | 11.94    |
| Sessa et al         | 6.500      | 0.790                | 12.210 | 6.65     |
| Arrue del cid et al | 1.210      | -0.583               | 3.003  | 11.47    |
| Enochs et al        | 1.200      | -0.311               | 2.711  | 11.74    |
| Surve et al         | -0.300     | -3.246               | 2.646  | 10.11    |
| Verhoef et al       | 6.800      | 6.103                | 7.497  | 12.30    |
| Clapp et al         | 0.000      | -1.345               | 1.345  | 11.88    |
| Hage et al          | 0.800      | -0.082               | 1.682  | 12.21    |
| theta               | 2.216      | 0.060                | 4.371  |          |

Test of theta = 0: z = 2.01

Prob > |z| = 0.0439

Test of homogeneity: Q = chi2(8) = 179.81

Prob > Q = 0.0000

### 1.2 Funnel plot and Egger's test showing publication bias; Mean difference pre-BMI (kg/m<sup>2</sup>) (X-axis) with it is standard error (Y-axis)

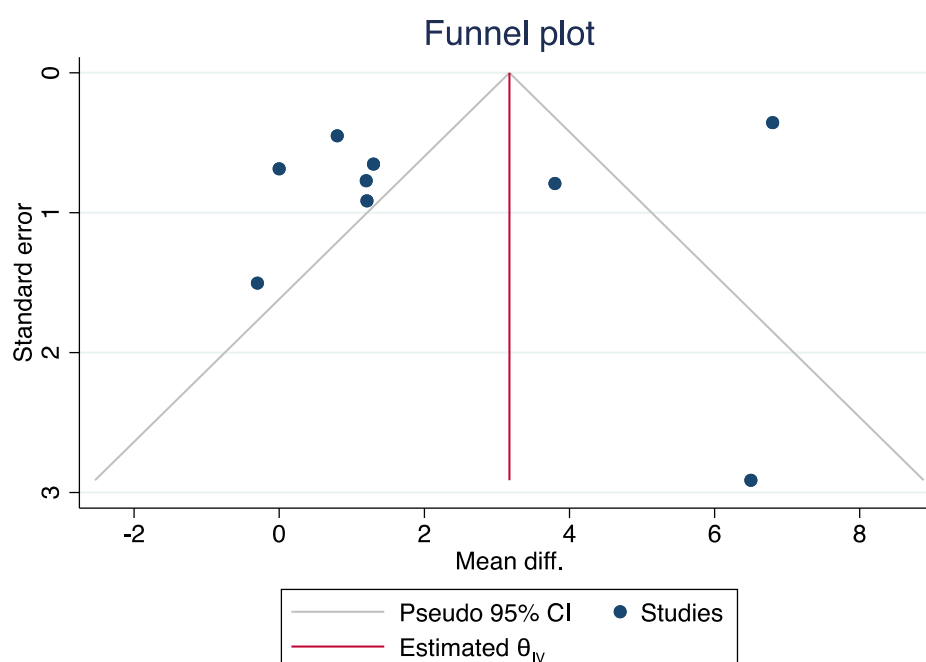

Egger's test for small-study effects:  
 Regress standard normal deviate of intervention  
 effect estimate against its standard error

Number of studies = 9

Root MSE = 4.383

| Std_Eff | Coef.     | Std. Err. | t     | P> t  | [95% Conf. Interval] |          |
|---------|-----------|-----------|-------|-------|----------------------|----------|
| slope   | 3.980251  | 2.345274  | 1.70  | 0.133 | -1.565442            | 9.525944 |
| bias    | -2.181482 | 3.500971  | -0.62 | 0.553 | -10.45996            | 6.097    |

Test of H0: no small-study effects

P = 0.553

### 1.3 Forest plot showing results of pre-BMI (kg/m<sup>2</sup>) mean difference metanalysis

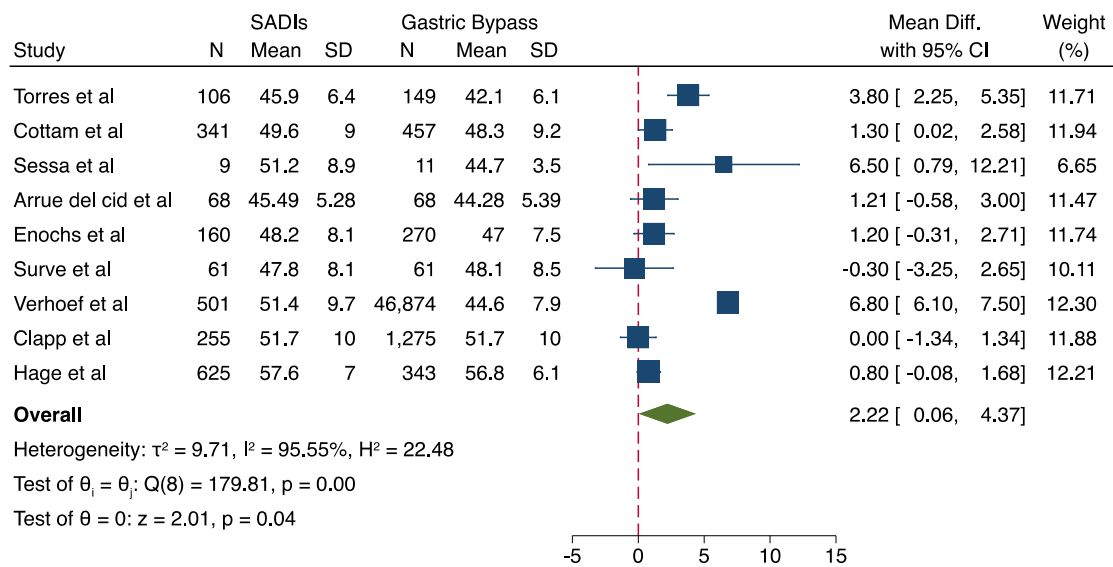

Random-effects DerSimonian-Laird model

## S.2 Post-BMI

### 2.1 Meta-analysis summary

Studies included: 5

Participants included: Unknown

Meta-analysis pooling of aggregate data  
using the random-effects inverse-variance model  
with DerSimonian-Laird estimate of  $\tau^2$

| name         | Effect | [95% Conf. Interval] |        | % Weight |
|--------------|--------|----------------------|--------|----------|
| Hage et al   | -7.500 | -8.588               | -6.412 | 20.34    |
| Surve et al  | -5.000 | -6.775               | -3.225 | 18.86    |
| Enochs et al | -2.400 | -3.427               | -1.373 | 20.45    |
| Cottam et al | -2.300 | -3.410               | -1.190 | 20.30    |
| Torres et al | -1.800 | -3.044               | -0.556 | 20.05    |
| Overall, DL  | -3.787 | -6.039               | -1.535 | 100.00   |

Test of overall effect = 0:  $z = -3.296$   $p = 0.001$

Heterogeneity measures, calculated from the data  
with Conf. Intervals based on Gamma (random-effects) distribution for Q

| Measure            | Value                  | df    | p-value |
|--------------------|------------------------|-------|---------|
| Cochran's Q        | 70.17                  | 4     | 0.000   |
|                    | -[95% Conf. Interval]- |       |         |
| H                  | 4.188                  | 1.368 | 7.094   |
| I <sup>2</sup> (%) | 94.3%                  | 46.6% | 98.0%   |

H = relative excess in Cochran's Q over its degrees-of-freedom

I<sup>2</sup> = proportion of total variation in effect estimate due to between-study heterogeneity (based on Q)

Heterogeneity variance estimates

| Method | $\tau^2$ |
|--------|----------|
| DL     | 6.1811   |

2.2 Funnel plot and Egger’s test showing publication bias; Mean difference post-BMI (kg/m²) (X-axis) with it is standard error (Y-axis)

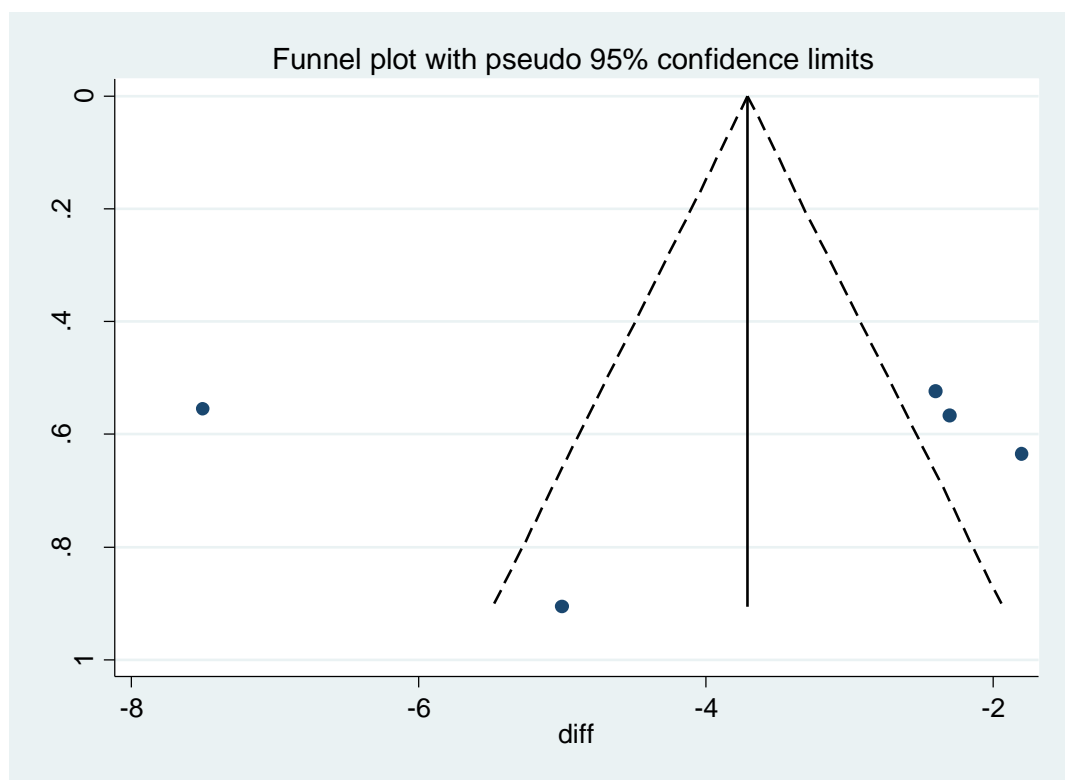

Egger's test for small-study effects:  
Regress standard normal deviate of intervention  
effect estimate against its standard error

.

Number of studies = 5

Root MSE = 4.819

| Std_Eff | Coef.     | Std. Err. | t     | P> t  | [95% Conf. Interval] |          |
|---------|-----------|-----------|-------|-------|----------------------|----------|
| slope   | -2.606134 | 7.576147  | -0.34 | 0.754 | -26.71681            | 21.50455 |
| bias    | -1.851368 | 12.54436  | -0.15 | 0.892 | -41.77312            | 38.07039 |

Test of H0: no small-study effects                      P = 0.892

2.3 Forest plot showing results of post-BMI (kg/m<sup>2</sup>) mean difference meta-analysis

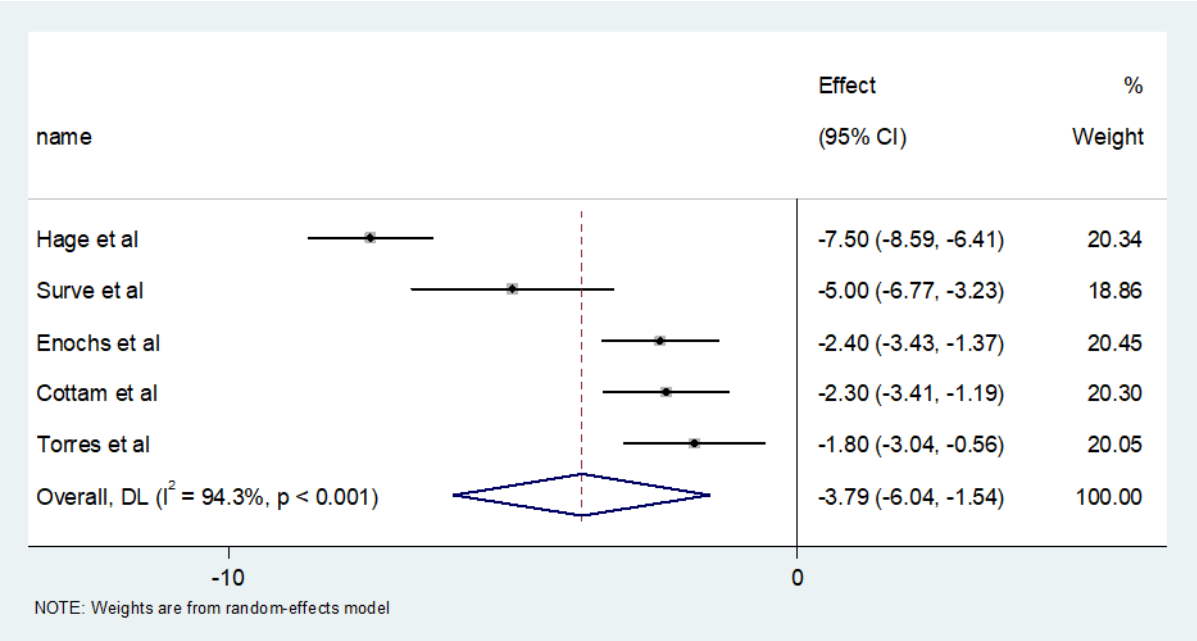

### S.3 Total weight loss (TWL)

#### 3.1 Meta-analysis summary

Meta-analysis summary  
Random-effects model  
Method: DerSimonian-Laird

Number of studies = 3  
Heterogeneity:  
tau2 = 25.1945  
I2 (%) = 95.99  
H2 = 24.93

| Study        | Mean Diff. | [95% Conf. Interval] |        | % Weight |
|--------------|------------|----------------------|--------|----------|
| Torres et al | 10.000     | 7.478                | 12.522 | 32.70    |
| Surve et al  | 5.300      | 3.052                | 7.548  | 33.12    |
| Hage et al   | 14.600     | 13.221               | 15.979 | 34.18    |
| theta        | 10.016     | 4.208                | 15.823 |          |

Test of theta = 0: z = 3.38

Prob > |z| = 0.0007

Test of homogeneity: Q = chi2(2) = 49.85

Prob > Q = 0.0000

#### 3.2 Funnel plot and Egger test showing publication bias; Mean difference TWL (X-axis) with it is standard error (Y-axis)

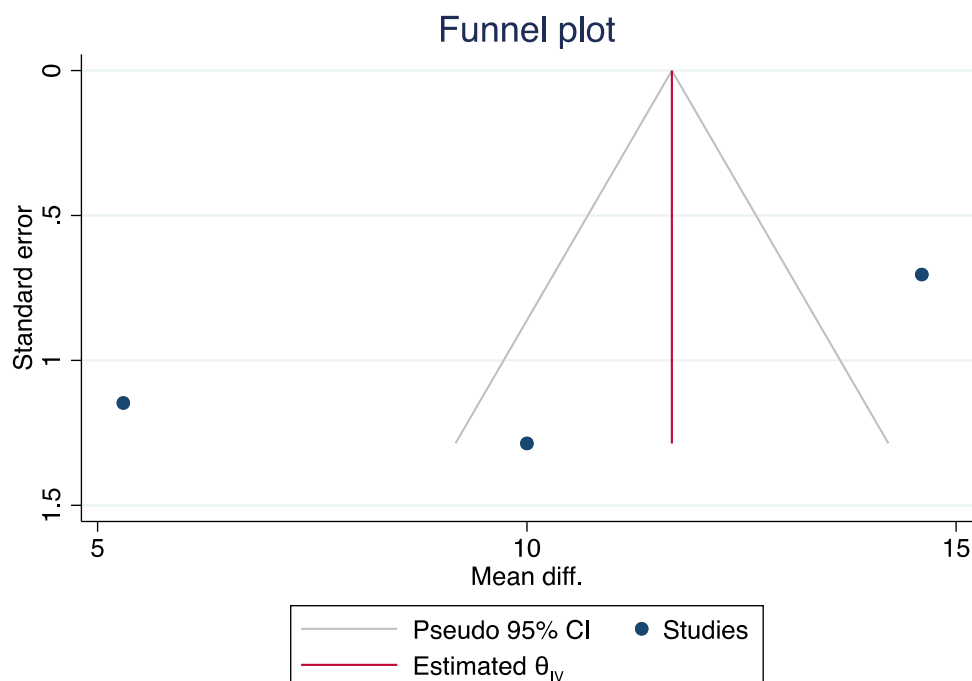

Egger's test for small-study effects:  
Regress standard normal deviate of intervention  
effect estimate against its standard error

.  
Number of studies = 3                      Root MSE        =     4.094

| Std_Eff | Coef.     | Std. Err. | t     | P> t  | [95% Conf. Interval] |          |
|---------|-----------|-----------|-------|-------|----------------------|----------|
| slope   | 24.75591  | 10.29694  | 2.40  | 0.251 | -106.0792            | 155.591  |
| bias    | -13.80095 | 10.33799  | -1.33 | 0.409 | -145.1575            | 117.5556 |

Test of H0: no small-study effects P = 0.409

### 3.3 Forest plot showing results of TWL (kg/m<sup>2</sup>) mean difference metanalysis

| Study          | N   | SADIs |      | Gastric Bypass |      |      | Mean Diff.<br>with 95% CI | Weight<br>(%) |
|----------------|-----|-------|------|----------------|------|------|---------------------------|---------------|
|                |     | Mean  | SD   | N              | Mean | SD   |                           |               |
| Torres et al   | 106 | 38.7  | 10.7 | 149            | 28.7 | 9.7  | 10.00 [ 7.48, 12.52]      | 32.70         |
| Surve et al    | 61  | 37.8  | 4.9  | 61             | 32.5 | 7.5  | 5.30 [ 3.05, 7.55]        | 33.12         |
| Hage et al     | 625 | 40.4  | 9.1  | 343            | 25.8 | 12.6 | 14.60 [ 13.22, 15.98]     | 34.18         |
| <b>Overall</b> |     |       |      |                |      |      | 10.02 [ 4.21, 15.82]      |               |

Heterogeneity:  $\tau^2 = 25.19$ ,  $I^2 = 95.99\%$ ,  $H^2 = 24.93$

Test of  $\theta_i = \theta_j$ :  $Q(2) = 49.85$ ,  $p = 0.00$

Test of  $\theta = 0$ :  $z = 3.38$ ,  $p = 0.00$

Random-effects DerSimonian-Laird model



## S.4 Excess weight loss

### 4.1. Meta-analysis summary

Meta-analysis pooling of aggregate data  
using the random-effects inverse-variance model  
with DerSimonian-Laird estimate of  $\tau^2$

| name          | Effect | [95% Conf. Interval] |        | % Weight |
|---------------|--------|----------------------|--------|----------|
| Surve et al.  | 11.100 | 7.169                | 15.031 | 27.03    |
| Enochs et al. | 10.300 | 6.193                | 14.407 | 26.16    |
| Cottam et al. | 6.200  | 2.483                | 9.917  | 28.11    |
| Torres et al. | 15.300 | 9.434                | 21.166 | 18.70    |
| Overall, DL   | 10.299 | 6.907                | 13.691 | 100.00   |

Test of overall effect = 0:  $z = 5.951$   $p = 0.000$

Heterogeneity measures, calculated from the data  
with Conf. Intervals based on Gamma (random-effects) distribution for Q

| Measure            | Value                  | df    | p-value |
|--------------------|------------------------|-------|---------|
| Cochran's Q        | 7.45                   | 3     | 0.059   |
|                    | -[95% Conf. Interval]- |       |         |
| H                  | 1.576                  | 1.000 | 2.798   |
| I <sup>2</sup> (%) | 59.8%                  | 0.0%  | 87.2%   |

H = relative excess in Cochran's Q over its degrees-of-freedom

I<sup>2</sup> = proportion of total variation in effect estimate due to between-study heterogeneity (based on Q)

Heterogeneity variance estimates

| Method | $\tau^2$ |
|--------|----------|
| DL     | 7.0591   |

4.2. Funnel plot and Egger's test showing publication bias: Mean difference EWL (X-axis) with it is standard error (Y-axis)

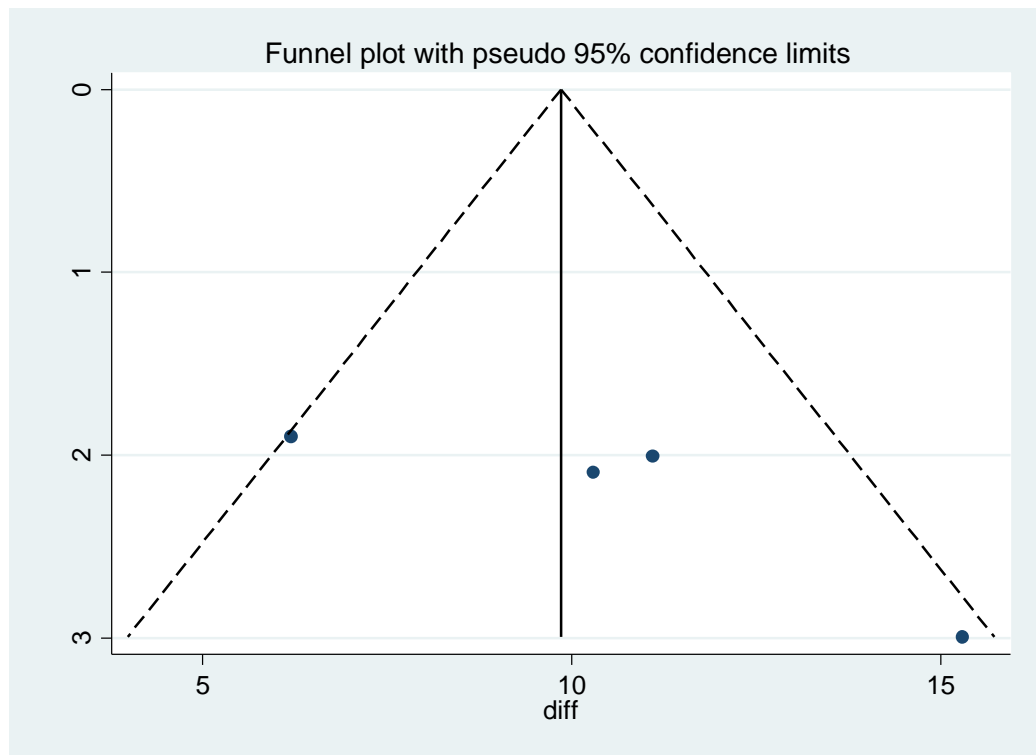

Egger's test for small-study effects:  
Regress standard normal deviate of intervention  
effect estimate against its standard error

.

| Number of studies = 4 |           |           |       | Root MSE | =                    | 1.093    |
|-----------------------|-----------|-----------|-------|----------|----------------------|----------|
| Std_Eff               | Coef.     | Std. Err. | t     | P> t     | [95% Conf. Interval] |          |
| slope                 | -5.066326 | 7.343567  | -0.69 | 0.562    | -36.66315            | 26.53049 |
| bias                  | 7.034679  | 3.416924  | 2.06  | 0.176    | -7.667157            | 21.73652 |

Test of H0: no small-study effects                      P = 0.176

4.3. Forest-plot showing results of excess weight loss meta-analysis

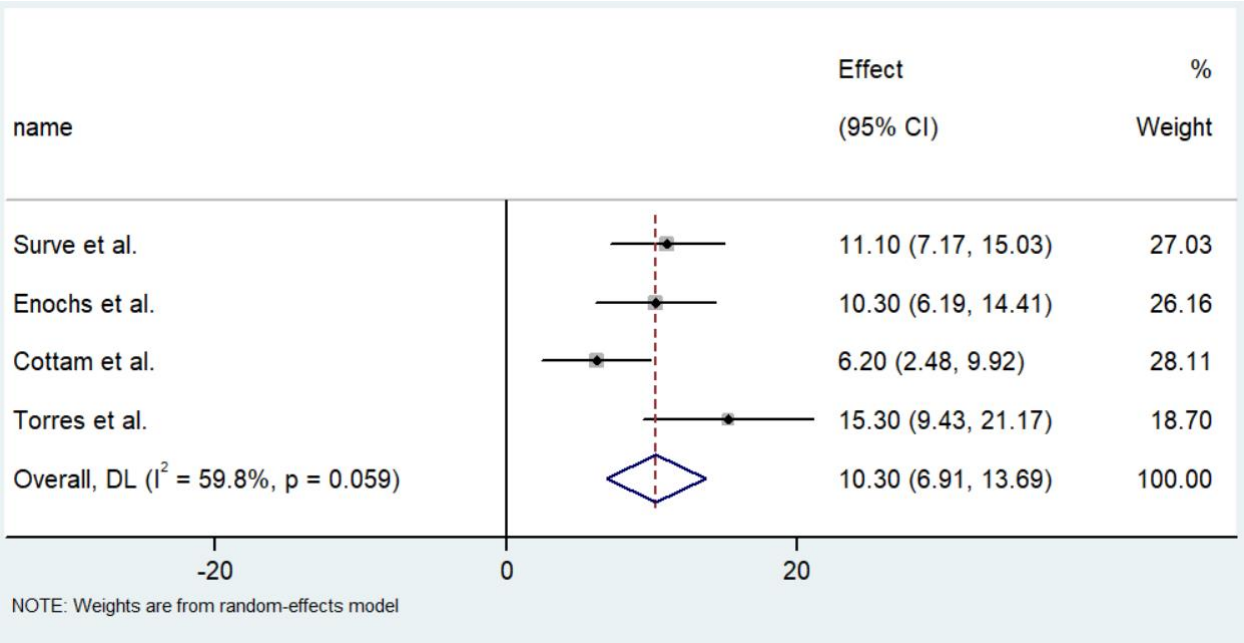

## S.5 Diabetes Mellitus remission

### 5.1. Meta-analysis summary

Meta-analysis pooling of Odds Ratios  
using the random-effects inverse-variance model  
with DerSimonian-Laird estimate of  $\tau^2$

| name                 | Odds  |                      |        |          |
|----------------------|-------|----------------------|--------|----------|
|                      | Ratio | [95% Conf. Interval] |        | % Weight |
| Hage et al.          | 6.844 | 3.824                | 12.248 | 25.56    |
| Enochs et al.        | 7.348 | 1.892                | 28.543 | 11.15    |
| Cottam et al.        | 2.567 | 1.391                | 4.740  | 24.77    |
| Torres et al.        | 2.562 | 1.384                | 4.743  | 24.70    |
| Arrue del cid et al. | 1.653 | 0.522                | 5.234  | 13.81    |
| Overall, DL          | 3.488 | 2.022                | 6.018  | 100.00   |

Test of overall effect = 1:  $z = 4.491$   $p = 0.000$

Heterogeneity measures, calculated from the data  
with Conf. Intervals based on Gamma (random-effects) distribution for Q

| Measure            | Value                  | df    | p-value |
|--------------------|------------------------|-------|---------|
| Cochran's Q        | 9.83                   | 4     | 0.043   |
|                    | -[95% Conf. Interval]- |       |         |
| H                  | 1.568                  | 1.000 | 2.669   |
| I <sup>2</sup> (%) | 59.3%                  | 0.0%  | 86.0%   |

H = relative excess in Cochran's Q over its degrees-of-freedom

I<sup>2</sup> = proportion of total variation in effect estimate due to between-study heterogeneity (based on Q)

Heterogeneity variance estimates

| Method | $\tau^2$ |
|--------|----------|
| DL     | 0.2146   |

5.2. Funnel plot and Egger's test showing publication bias; diabetes mellitus remission (log OR)(X-axis) with it is standard error (Y-axis)

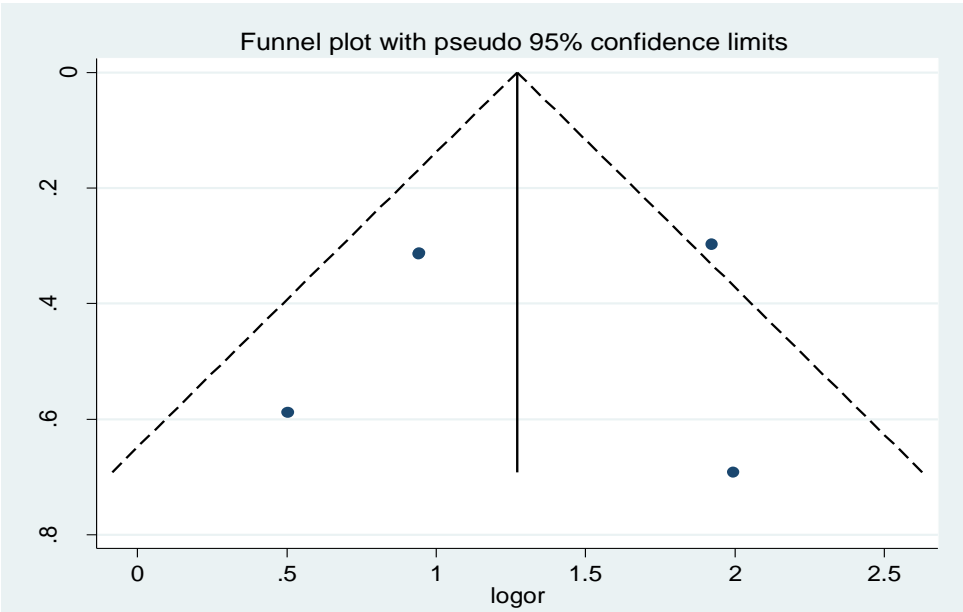

Egger's test for small-study effects:  
Regress standard normal deviate of intervention  
effect estimate against its standard error

.

| Number of studies = 5 |           |           | Root MSE |       | = 1.805              |          |
|-----------------------|-----------|-----------|----------|-------|----------------------|----------|
| Std_Eff               | Coef.     | Std. Err. | t        | P> t  | [95% Conf. Interval] |          |
| slope                 | 1.391467  | .9751624  | 1.43     | 0.249 | -1.711935            | 4.494869 |
| bias                  | -.3435858 | 2.640478  | -0.13    | 0.905 | -8.746767            | 8.059595 |

Test of H0: no small-study effects                      P = 0.905

5.3. Forest plot showing results of diabetes mellitus remission meta-analysis

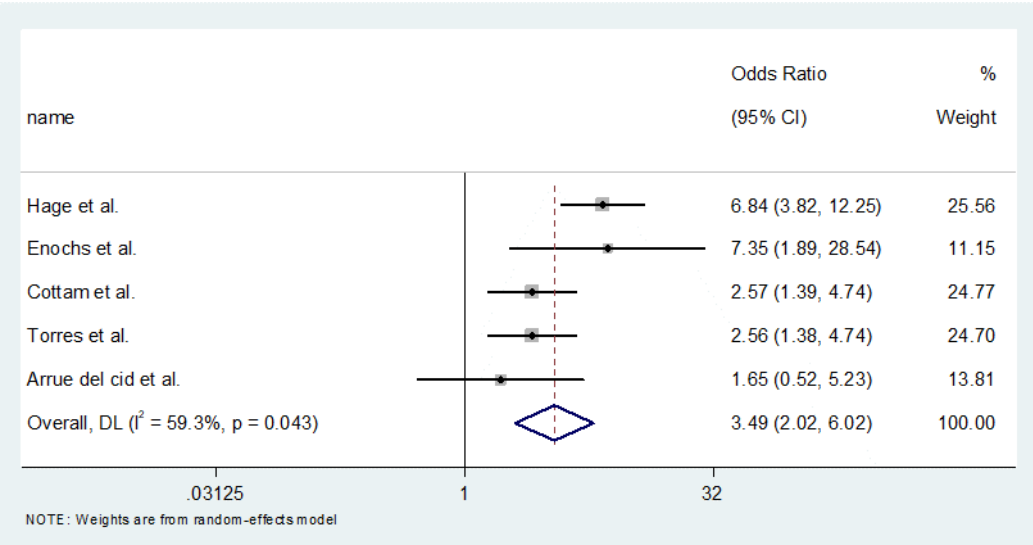

## S.6 Hypertension remission

### 6.1. Meta-analysis summary

Studies included: 2

Participants included: 512

Meta-analysis pooling of Odds Ratios  
using the random-effects inverse-variance model  
with DerSimonian-Laird estimate of  $\tau^2$

| study               | Odds<br>Ratio | [95% Conf. Interval] |        | % Weight |
|---------------------|---------------|----------------------|--------|----------|
| Hage et al.         | 8.159         | 5.114                | 13.018 | 51.28    |
| Arue del Cid et al. | 1.703         | 0.864                | 3.357  | 48.72    |
| Overall, DL         | 3.804         | 0.820                | 17.647 | 100.00   |

Test of overall effect = 1:  $z = 1.706$   $p = 0.088$

Heterogeneity measures, calculated from the data  
with Conf. Intervals based on Gamma (random-effects) distribution for Q

| Measure            | Value                  | df    | p-value |
|--------------------|------------------------|-------|---------|
| Cochran's Q        | 13.90                  | 1     | 0.000   |
|                    | -[95% Conf. Interval]- |       |         |
| H                  | 3.728                  | 1.000 | 8.355   |
| I <sup>2</sup> (%) | 92.8%                  | 0.0%  | 98.6%   |

H = relative excess in Cochran's Q over its degrees-of-freedom

I<sup>2</sup> = proportion of total variation in effect estimate due to between-study heterogeneity (based on Q)

Heterogeneity variance estimates

| Method | $\tau^2$ |
|--------|----------|
| DL     | 1.1386   |

6.2. Funnel plot showing publication bias; Hypertension remission (log OR)(X-axis) with it is standard error (Y-axis)

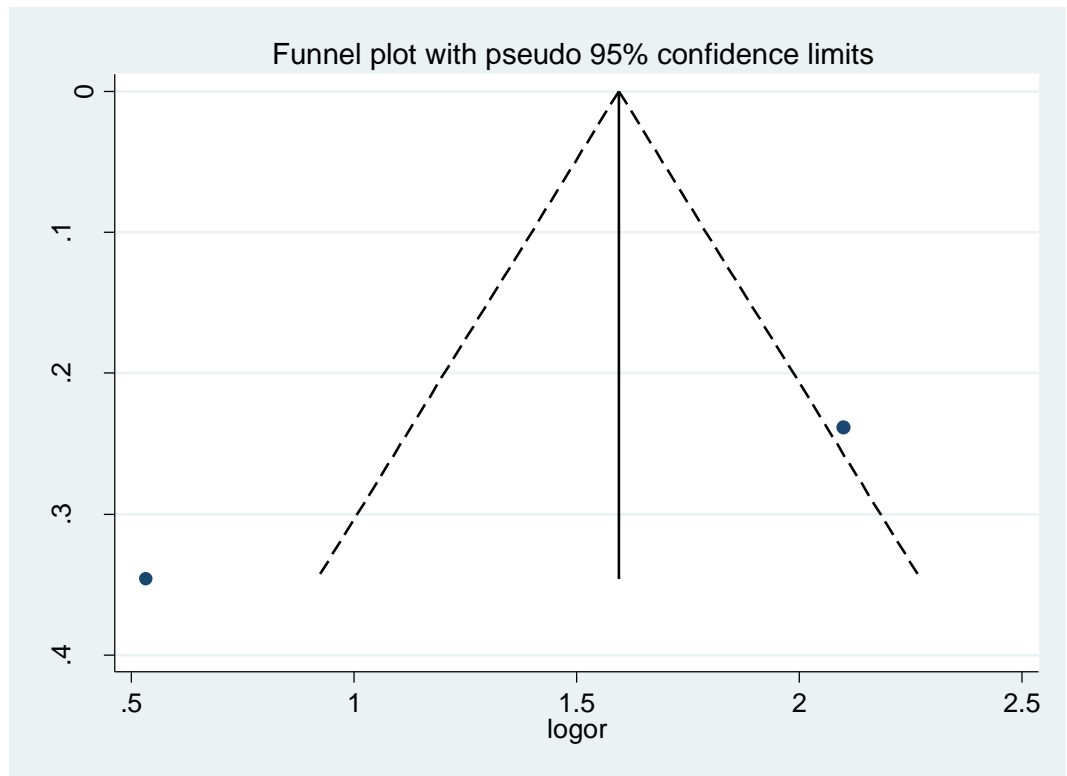

6.3. Forest plot showing results of Hypertension remission metanalysis

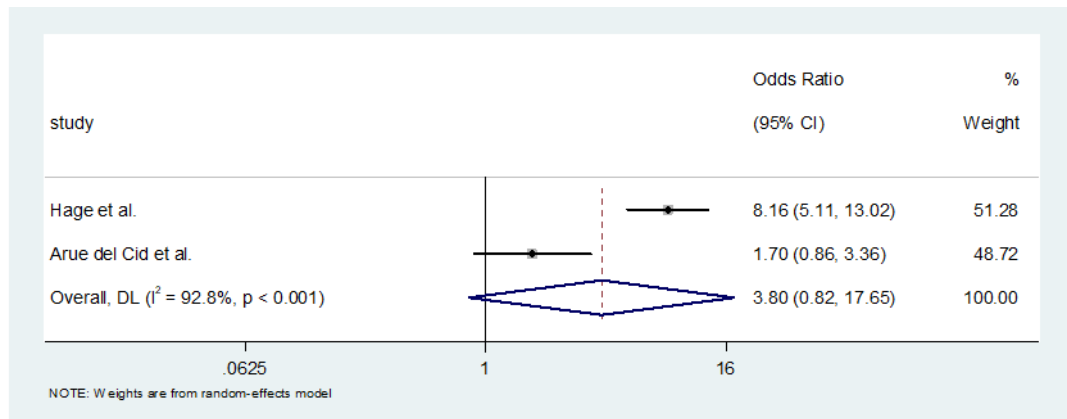



## S.7 Short-term postoperative complications

### 7.1. Meta-analysis summary

Meta-analysis summary  
Random-effects model  
Method: DerSimonian-Laird

Number of studies = 7  
Heterogeneity:  
tau2 = 0.7198  
I2 (%) = 90.75  
H2 = 10.81

| Study               | Odds Ratio | [95% Conf. Interval] |        | % Weight |
|---------------------|------------|----------------------|--------|----------|
| Cottam et al        | 0.441      | 0.318                | 0.613  | 18.55    |
| Sessa et al         | 1.211      | 0.022                | 66.958 | 2.82     |
| Arrue del cid et al | 0.485      | 0.181                | 1.305  | 14.24    |
| Surve et al         | 1.000      | 0.304                | 3.293  | 12.73    |
| Verhoef et al       | 1.953      | 1.507                | 2.533  | 18.81    |
| Clapp et al         | 2.498      | 1.560                | 3.998  | 17.84    |
| Hage et al          | 0.541      | 0.223                | 1.314  | 15.00    |
| exp(theta)          | 0.949      | 0.457                | 1.970  |          |

Test of theta = 0: z = -0.14 Prob > |z| = 0.8888

Test of homogeneity: Q = chi2(6) = 64.83 Prob > Q = 0.0000

### 7.2. Funnel plot and Egger's test showing publication bias; short-term postoperative complications (log OR)(X-axis) with it is standard error (Y-axis)

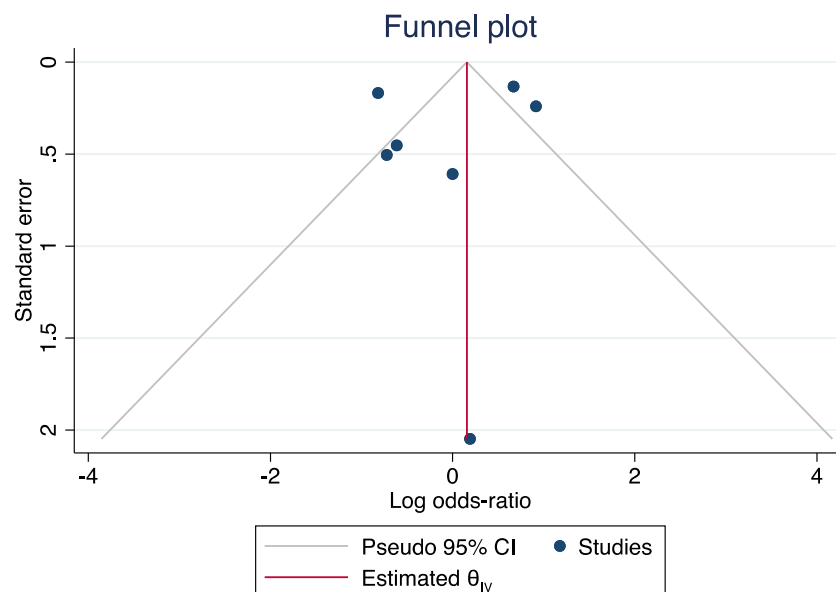

Egger's test for small-study effects:  
Regress standard normal deviate of intervention  
effect estimate against its standard error

```
.
Number of studies =   7                                Root MSE      =    3.525
```

| Std_Eff | Coef.     | Std. Err. | t     | P> t  | [95% Conf. Interval] |          |
|---------|-----------|-----------|-------|-------|----------------------|----------|
| slope   | .3735103  | .5617702  | 0.66  | 0.536 | -1.070566            | 1.817587 |
| bias    | -1.095809 | 2.342295  | -0.47 | 0.660 | -7.116871            | 4.925253 |

Test of H0: no small-study effects P = 0.660

### 7.3. Forest plot showing results of short-term postoperative complications metanalysis

| Study               | SADIs |     | Gastric Bypass |        |                                                                                     | Odds Ratio<br>with 95% CI | Weight<br>(%) |
|---------------------|-------|-----|----------------|--------|-------------------------------------------------------------------------------------|---------------------------|---------------|
|                     | Yes   | No  | Yes            | No     |                                                                                     |                           |               |
| Cottam et al        | 67    | 274 | 163            | 294    |  | 0.44 [ 0.32, 0.61]        | 18.55         |
| Sessa et al         | 0     | 9   | 0              | 11     |  | 1.21 [ 0.02, 66.96]       | 2.82          |
| Arrue del cid et al | 7     | 61  | 13             | 55     |  | 0.49 [ 0.18, 1.30]        | 14.24         |
| Surve et al         | 6     | 55  | 6              | 55     |  | 1.00 [ 0.30, 3.29]        | 12.73         |
| Verhoef et al       | 67    | 434 | 3,433          | 43,441 |  | 1.95 [ 1.51, 2.53]        | 18.81         |
| Clapp et al         | 28    | 227 | 60             | 1,215  |  | 2.50 [ 1.56, 4.00]        | 17.84         |
| Hage et al          | 10    | 615 | 10             | 333    |  | 0.54 [ 0.22, 1.31]        | 15.00         |
| <b>Overall</b>      |       |     |                |        |  | 0.95 [ 0.46, 1.97]        |               |

Heterogeneity:  $\tau^2 = 0.72$ ,  $I^2 = 90.75\%$ ,  $H^2 = 10.81$

Test of  $\theta_i = \theta_j$ :  $Q(6) = 64.83$ ,  $p = 0.00$

Test of  $\theta = 0$ :  $z = -0.14$ ,  $p = 0.89$

A number line with tick marks at  $\frac{1}{32}$ ,  $\frac{1}{4}$ , 2, and 16. A red dot is placed on the line between  $\frac{1}{4}$  and 2.

Random-effects DerSimonian-Laird model

## S.8 Long-term postoperative complications

### 8.1. Meta-analysis summary

|                           |                     |        |
|---------------------------|---------------------|--------|
| Meta-analysis summary     | Number of studies = | 3      |
| Random-effects model      | Heterogeneity:      |        |
| Method: DerSimonian-Laird | tau2 =              | 1.2746 |
|                           | I2 (%) =            | 94.02  |
|                           | H2 =                | 16.73  |

| Study        | Odds Ratio | [95% Conf. Interval] |       | % Weight |
|--------------|------------|----------------------|-------|----------|
| Cottam et al | 0.072      | 0.050                | 0.103 | 34.86    |
| Surve et al  | 0.148      | 0.066                | 0.335 | 31.54    |
| Hage et al   | 0.529      | 0.299                | 0.934 | 33.60    |
| exp(theta)   | 0.176      | 0.047                | 0.663 |          |

|                                          |                     |
|------------------------------------------|---------------------|
| Test of theta = 0: z = -2.57             | Prob >  z  = 0.0102 |
| Test of homogeneity: Q = chi2(2) = 33.46 | Prob > Q = 0.0000   |

### 8.2. Funnel plot showing publication bias; long-term postoperative complications (log OR)(X-axis) with it is standard error (Y-axis)

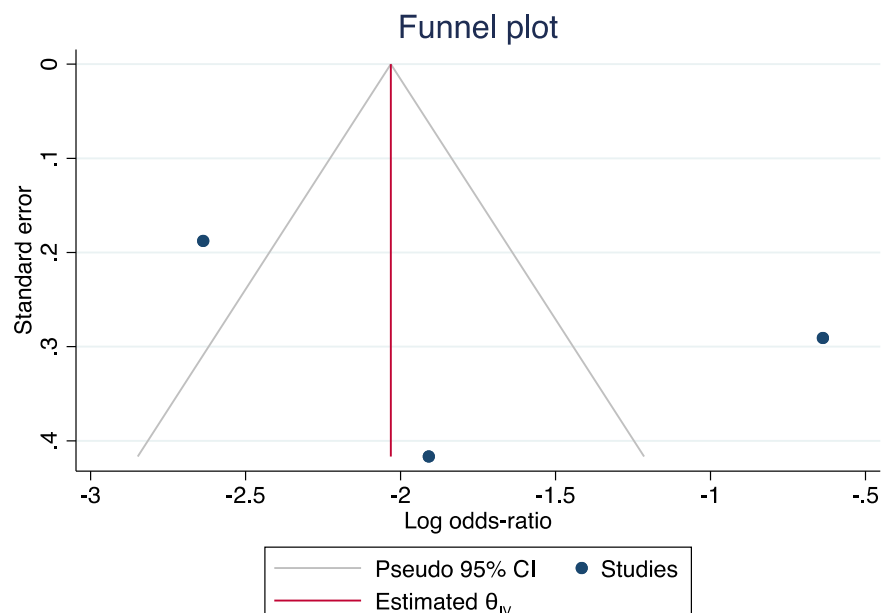

Egger's test for small-study effects:  
Regress standard normal deviate of intervention  
effect estimate against its standard error

Number of studies = 3                      Root MSE                =     4.629

| Std_Eff | Coef.     | Std. Err. | t     | P> t  | [95% Conf. Interval] |          |
|---------|-----------|-----------|-------|-------|----------------------|----------|
| slope   | -3.603422 | 2.205775  | -1.63 | 0.350 | -31.63045            | 24.42361 |
| bias    | 6.472213  | 8.634635  | 0.75  | 0.591 | -103.2412            | 116.1857 |

Test of H0: no small-study effects P = 0.591

### 8.3. Forest plot showing results of long-term postoperative complications metanalysis

| Study          | SADIs |     | Gastric Bypass |     | Odds Ratio<br>with 95% CI | Weight<br>(%) |
|----------------|-------|-----|----------------|-----|---------------------------|---------------|
|                | Yes   | No  | Yes            | No  |                           |               |
| Cottam et al   | 70    | 271 | 267            | 74  | 0.07 [ 0.05, 0.10]        | 34.86         |
| Surve et al    | 12    | 49  | 38             | 23  | 0.15 [ 0.07, 0.34]        | 31.54         |
| Hage et al     | 19    | 606 | 35             | 590 | 0.53 [ 0.30, 0.93]        | 33.60         |
| <b>Overall</b> |       |     |                |     | 0.18 [ 0.05, 0.66]        |               |

Heterogeneity:  $\tau^2 = 1.27$ ,  $I^2 = 94.02\%$ ,  $H^2 = 16.73$

Test of  $\theta_i = \theta_j$ :  $Q(2) = 33.46$ ,  $p = 0.00$

Test of  $\theta = 0$ :  $z = -2.57$ ,  $p = 0.01$

Random-effects DerSimonian-Laird model

## S.9 Severe complications (Clavien-Dindo >3)

### 9.1. Meta-analysis summary

Studies included: 6

Participants included: 49982

Meta-analysis pooling of Odds Ratios  
using the random-effects inverse-variance model  
with DerSimonian-Laird estimate of  $\tau^2$

| name                 | Odds  |                      |        |          |
|----------------------|-------|----------------------|--------|----------|
|                      | Ratio | [95% Conf. Interval] |        | % Weight |
| Surve et al.         | 0.040 | 0.014                | 0.117  | 17.87    |
| Cottam et al.        | 0.397 | 0.252                | 0.625  | 20.82    |
| Arrue del cid et al. | 1.000 | 0.195                | 5.139  | 14.44    |
| Sessa et al.         | 1.222 | 0.022                | 67.923 | 5.42     |
| Verhoef et al.       | 1.302 | 0.977                | 1.734  | 21.29    |
| Clapp et al.         | 3.797 | 2.040                | 7.070  | 20.17    |
| Overall, DL          | 0.651 | 0.221                | 1.916  | 100.00   |

Test of overall effect = 1:  $z = -0.779$   $p = 0.436$

Heterogeneity measures, calculated from the data  
with Conf. Intervals based on Gamma (random-effects) distribution for Q

| Measure            | Value                  | df    | p-value |
|--------------------|------------------------|-------|---------|
| Cochran's Q        | 71.81                  | 5     | 0.000   |
|                    | -[95% Conf. Interval]- |       |         |
| H                  | 3.790                  | 1.000 | 6.982   |
| I <sup>2</sup> (%) | 93.0%                  | 0.0%  | 97.9%   |

H = relative excess in Cochran's Q over its degrees-of-freedom

I<sup>2</sup> = proportion of total variation in effect estimate due to between-study heterogeneity (based on Q)

Heterogeneity variance estimates

| Method | $\tau^2$ |
|--------|----------|
| DL     | 1.4050   |

9.2. Funnel plot and Egger's test showing publication bias; severe postoperative complications (log OR)(X-axis) with it is standard error (Y-axis)

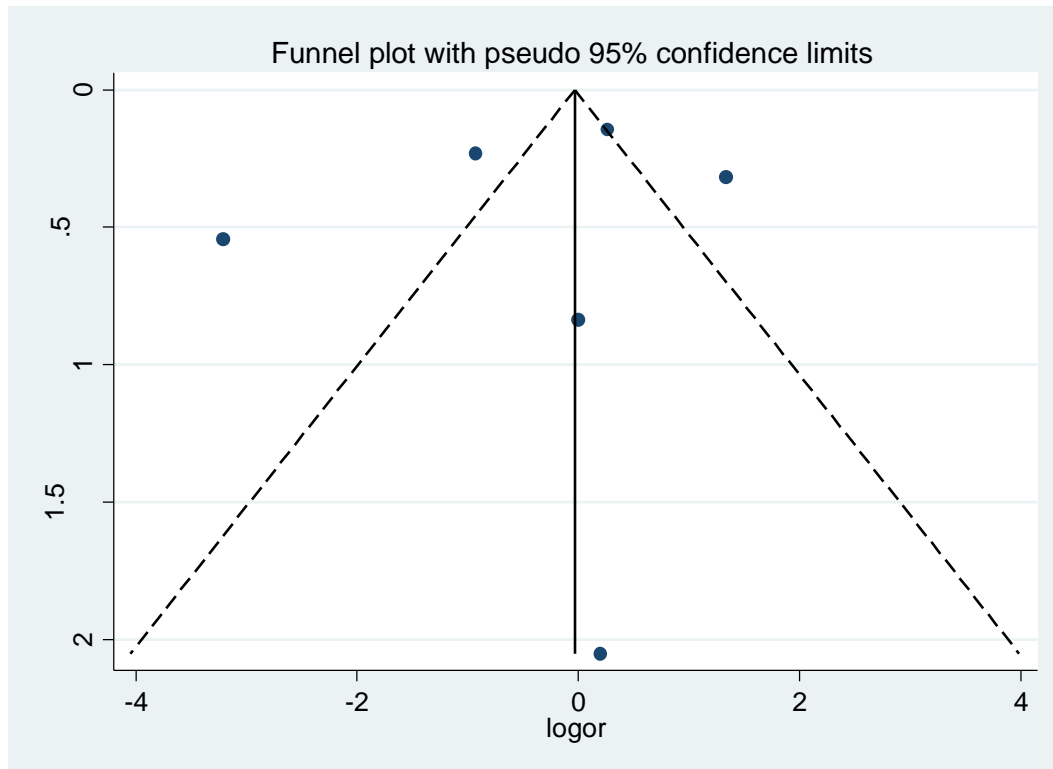

Egger's test for small-study effects:  
Regress standard normal deviate of intervention  
effect estimate against its standard error

.  
Number of studies = 5                      Root MSE        =     4.577

| Std_Eff | Coef.     | Std. Err. | t     | P> t  | [95% Conf. Interval] |          |
|---------|-----------|-----------|-------|-------|----------------------|----------|
| slope   | .5484756  | 1.023577  | 0.54  | 0.629 | -2.709002            | 3.805954 |
| bias    | -2.683182 | 4.100492  | -0.65 | 0.560 | -15.73278            | 10.36641 |

Test of H0: no small-study effects P = 0.560

9.3. Forest plot showing results of severe complications metanalysis

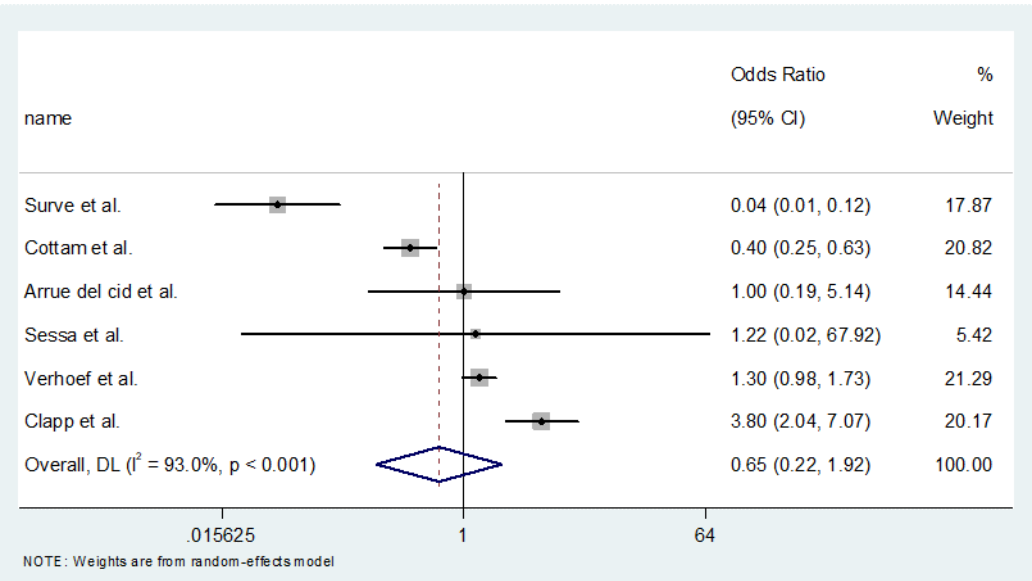

## S.10 Operative duration

### 10.1. Meta-analysis summary

Meta-analysis summary  
Random-effects model  
Method: DerSimonian-Laird

Number of studies = **4**  
Heterogeneity:  
tau2 = **1.3e+03**  
I2 (%) = **98.60**  
H2 = **71.61**

| Study         | Mean Diff.     | [95% Conf. Interval] |                | % Weight     |
|---------------|----------------|----------------------|----------------|--------------|
| Sessa et al   | <b>69.800</b>  | <b>42.576</b>        | <b>97.024</b>  | <b>22.61</b> |
| Verhoef et al | <b>10.900</b>  | <b>5.339</b>         | <b>16.461</b>  | <b>25.90</b> |
| Clapp et al   | <b>15.100</b>  | <b>7.698</b>         | <b>22.502</b>  | <b>25.77</b> |
| Hage et al    | <b>-51.400</b> | <b>-59.383</b>       | <b>-43.417</b> | <b>25.72</b> |
| theta         | <b>9.276</b>   | <b>-26.318</b>       | <b>44.870</b>  |              |

Test of theta = 0: z = **0.51**

Prob > |z| = **0.6095**

Test of homogeneity: Q = chi2(3) = **214.84**

Prob > Q = **0.0000**

### 10.2 Funnel plot showing publication bias; mean difference operative duration (minutes) with it is standard error (Y-axis)

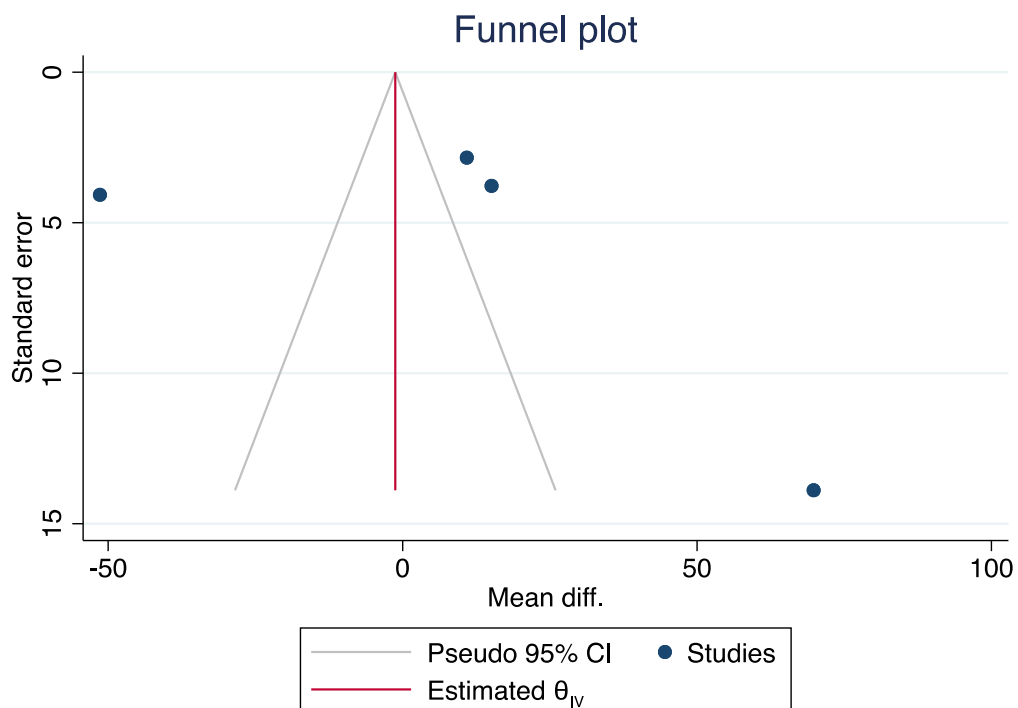



10.3. Forest plot showing results of mean difference operative duration (minutes)  
metanalysis

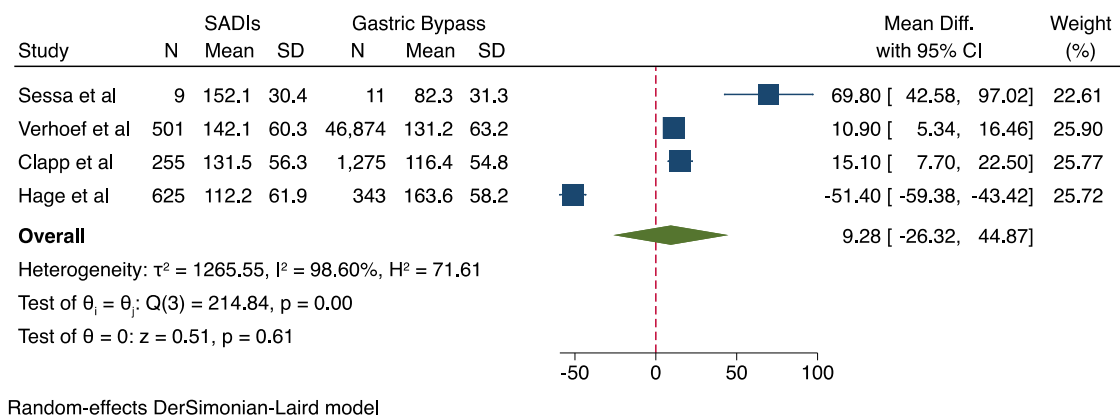

## S.11 Hospital stay

### 11.1. Meta-analysis summary

Meta-analysis summary  
Random-effects model  
Method: DerSimonian-Laird

Number of studies = 5  
Heterogeneity:  
tau2 = 0.5866  
I2 (%) = 93.61  
H2 = 15.64

| Study               | Mean Diff. | [95% Conf. Interval] |        | % Weight |
|---------------------|------------|----------------------|--------|----------|
| Sessa et al         | 1.100      | 0.433                | 1.767  | 21.30    |
| Arrue del cid et al | 0.080      | -2.914               | 3.074  | 5.12     |
| Surve et al         | -0.700     | -1.038               | -0.362 | 24.28    |
| Clapp et al         | 0.570      | 0.330                | 0.810  | 24.87    |
| Hage et al          | -0.600     | -0.915               | -0.285 | 24.43    |
| theta               | 0.064      | -0.694               | 0.822  |          |

Test of theta = 0: z = 0.16

Prob > |z| = 0.8693

Test of homogeneity: Q = chi2(4) = 62.58

Prob > Q = 0.0000

### 11.2. Funnel plot showing publication bias; mean difference in hospital stay (days) with it is standard error (Y-axis)

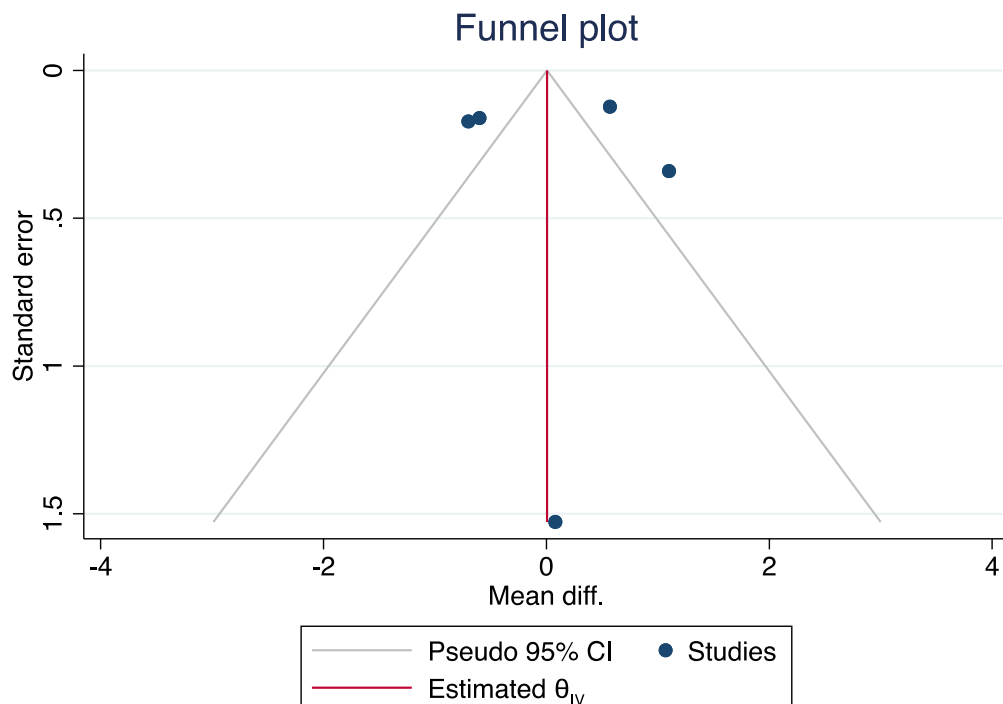

Egger's test for small-study effects:  
Regress standard normal deviate of intervention  
effect estimate against its standard error

.

Number of studies = 5

Root MSE = 3.747

| Std_Eff | Coef.     | Std. Err. | t     | P> t  | [95% Conf. Interval] |          |
|---------|-----------|-----------|-------|-------|----------------------|----------|
| slope   | -.5319491 | .8396643  | -0.63 | 0.571 | -3.204136            | 2.140237 |
| bias    | 2.005846  | 3.817668  | 0.53  | 0.636 | -10.14368            | 14.15537 |

Test of H0: no small-study effects                      P = 0.636

11.3. Forest plot showing results of hospital stay (days) metanalysis

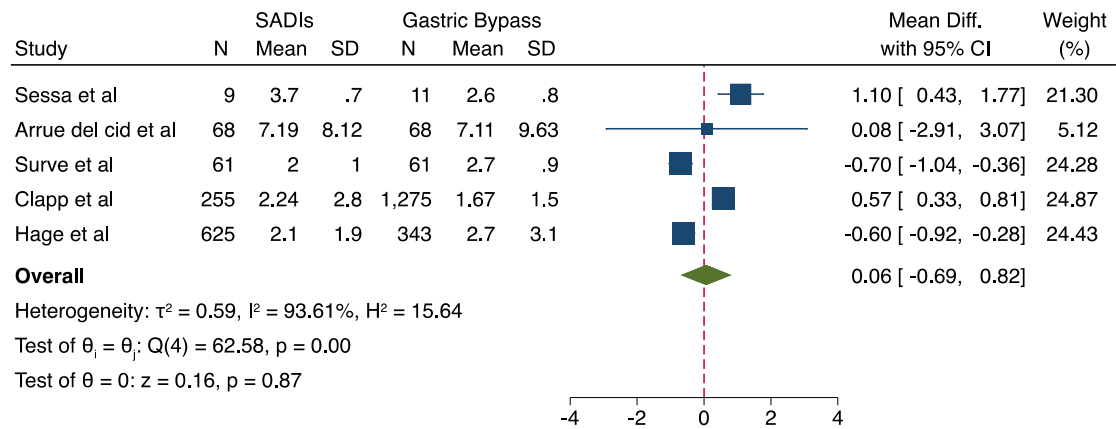

Random-effects DerSimonian-Laird model



## S.12. Assessment of methodological quality

| <b>Table 3. Newcastle-Ottawa score for the included studies</b> |                                     |                                        |                                  |                                                                                 |                                                                        |                              |                                                        |                                         |                    |
|-----------------------------------------------------------------|-------------------------------------|----------------------------------------|----------------------------------|---------------------------------------------------------------------------------|------------------------------------------------------------------------|------------------------------|--------------------------------------------------------|-----------------------------------------|--------------------|
| <b>First author, year</b>                                       | <b>Representativeness of cohort</b> | <b>Selection of non-exposed cohort</b> | <b>Ascertainment of exposure</b> | <b>Demonstration that outcome of interest was not present at start of study</b> | <b>Comparability of cohorts on the basis of the design or analysis</b> | <b>Assessment of outcome</b> | <b>Was follow-up long enough for outcomes to occur</b> | <b>Adequacy of follow up of cohorts</b> | <b>Total score</b> |
| Hage et al (2024)                                               | ★                                   | ★                                      | ★                                | ★                                                                               | ★                                                                      | ★                            | ★                                                      | ★                                       | 8                  |
| Surve et al (2020)                                              | ★                                   | ★                                      | ★                                | ★                                                                               | ★                                                                      | ★                            | ★                                                      | ★                                       | 8                  |
| Enochs et al (2019)                                             | ★                                   | ★                                      | ★                                | ★                                                                               | ★                                                                      | ★                            | ★                                                      | ★                                       | 8                  |
| Cottam et al (2018)                                             | ★                                   | ★                                      | ★                                | ★                                                                               | ★                                                                      | ★                            | ★                                                      | ★                                       | 8                  |
| Torres et al (2017)                                             | ★                                   | ★                                      | ★                                | ★                                                                               | ★                                                                      | ★                            | ★                                                      | ★                                       | 8                  |
| Arrue del Cid et al (2019)                                      | ★                                   | ★                                      | ★                                | ★                                                                               | ★                                                                      | ★                            | ★                                                      | ★                                       | 8                  |
| Verhoef et al (2022)*                                           | ★                                   | ★                                      | ★                                | ★                                                                               | ★                                                                      | ★                            | ★                                                      | ★                                       | 8                  |
| Clapp et al (2022)*                                             | ★                                   | ★                                      | ★                                | ★                                                                               | ★                                                                      | ★                            | ★                                                      | ★                                       | 8                  |
| Sessa et al (2019)*                                             | ★                                   | ★                                      | ★                                | ★                                                                               | ★                                                                      | ★                            | ★                                                      | ★                                       | 8                  |

\*This studies were evaluated just for preoperative variables, short-term complications, operative duration and hospital stay.

### S.13. Studies excluded from the systematic review

| <b>Table 4. Studies excluded from the systematic review</b>                                                                                                                                                                                            |                                   |                           |
|--------------------------------------------------------------------------------------------------------------------------------------------------------------------------------------------------------------------------------------------------------|-----------------------------------|---------------------------|
| <b>Study</b>                                                                                                                                                                                                                                           | <b>PMID/DOI</b>                   | <b>Cause of exclusion</b> |
| Prospective multicentre randomised trial comparing the efficacy and safety of single-anastomosis duodeno-ileal bypass with sleeve gastrectomy (SADI-S) versus Roux-en-Y gastric bypass (RYGB): SADISLEEVE study protocol                               | <b>35414539</b>                   | Only protocol             |
| Comparison of Efficacy and Safety Between Roux-en-Y Gastric Bypass (RYGB) vs One Anastomosis Gastric Bypass (OAGB) vs Single Anastomosis Duodeno-ileal Bypass with Sleeve Gastrectomy (SADI-S): a Systematic Review of Bariatric and Metabolic Surgery | <b>34981238</b>                   | Review                    |
| [Comparative results of various methods of surgical treatment of severe forms of metabolic syndrome].                                                                                                                                                  | <b>22950270</b>                   | SADI-S not included       |
| Evaluation of the Efficacy of Single Anastomosis Sleeve Ileal (SASI) Bypass for Patients with Morbid Obesity: a Multicenter Study                                                                                                                      | <b>31734889</b>                   | No comparison with RYGB   |
| Comparison of short- and long-term outcomes of bariatric surgery methods: A retrospective study.                                                                                                                                                       | <b>36197162</b>                   | SADI-S not included       |
| Bariatric surgery: effects on the metabolic complications of obesity.                                                                                                                                                                                  | <b>22287091</b>                   | SADI-S not included       |
| Single anastomosis duodenal switch (SADI-S) versus Roux-en-y gastric bypass- defining a new gold standard in metabolic surgery                                                                                                                         | -                                 | Only protocol             |
| Outcomes of SADI and OAGB Compared to RYGB from the Metabolic and Bariatric Surgery Quality Improvement Program: The North American Experience                                                                                                         | <b>10.1007/s11695-023-07019-x</b> | No data for metaanalysis  |
| A Comparison of the Bariatric Procedures that Are Performed in the Treatment of Super Morbid Obesity.                                                                                                                                                  | <b>28451928</b>                   | SADI-S not included       |
| Trends in Utilization and Relative Complication Rates of Bariatric Procedures.                                                                                                                                                                         | <b>31012048</b>                   | SADI-S not included       |
| Bariatric surgery and prevention of cardiovascular events and mortality in morbid obesity: mechanisms of action and choice of surgery.                                                                                                                 | <b>25770762</b>                   | SADI-S not included       |
| Morbid obesity treatment by SADI-S: a multi-center randomized controlled clinical trial                                                                                                                                                                | <b>32873678</b>                   | Only protocol             |

|                                                                                                                                                                                                                                                 |                 |                     |
|-------------------------------------------------------------------------------------------------------------------------------------------------------------------------------------------------------------------------------------------------|-----------------|---------------------|
| Long-Term Outcomes of Bariatric and Metabolic Surgery in Japan: Results of a Multi-Institutional Survey.                                                                                                                                        | <b>27631329</b> | SADI-S not included |
| [Analysis of the 1-year curative efficacy of sleeve gastrectomy, Roux-en-Y gastric bypass, single anastomosis duodenal-ileal bypass with sleeve gastrectomy and biliopancreatic diversion with duodenal switch in patients with super obesity]. | <b>37709694</b> | Chinese language    |
| Efficacy of Different Procedures of Metabolic Surgery for Type 2 Diabetes in Asia: a Multinational and Multicenter Exploratory Study.                                                                                                           | <b>33523416</b> | SADI-S not included |
| Single-anastomosis Duodeno Ileal Bypass (SADI) Versus Roux-en-Y Gastric Bypass<br>NCT03610256                                                                                                                                                   | -               | Only protocol       |
| Comparative Effectiveness and Safety of Bariatric Procedures for Weight Loss: A PCORnet Cohort Study.                                                                                                                                           | <b>30383139</b> | SADI-S not included |
| Atherogenic Dyslipidemia Remission 1 Year After Bariatric Surgery                                                                                                                                                                               | <b>27988827</b> | SADI-S not included |
| Comparative Effectiveness of Different Bariatric Procedures in Super Morbid Obesity.                                                                                                                                                            | <b>30251091</b> | SADI-S not included |
